# Supplementary material
Source: Springer Nature journal article supplement (https://www.springermedizin.de/resource/supplementary/12913_2013_2895_MOESM3_ESM.pdf/9531804)

**(a) Demographic groups**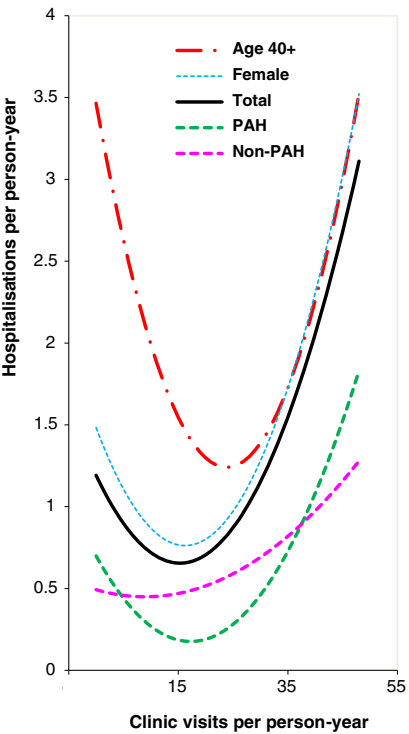**(b) Adult chronic diseases**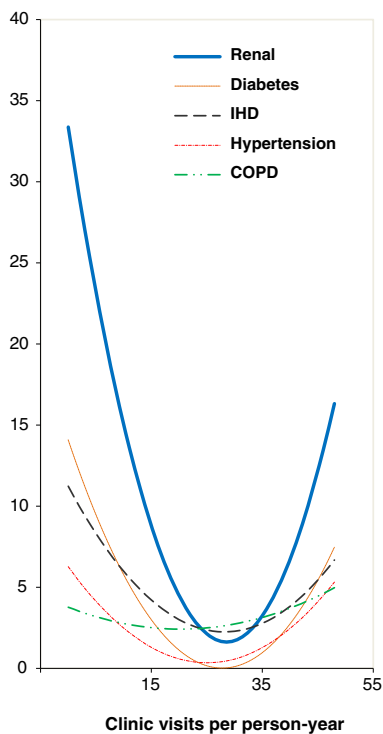**(c) Child health conditions**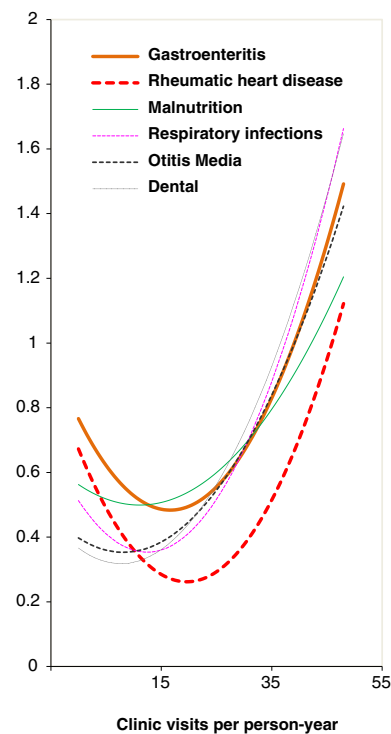

Supplement: MOESM3 [file 9531804]
